# Supplementary material for: Griffithsin and Carrageenan Combination To Target Herpes Simplex Virus 2 and Human Papillomavirus
Source: PubMed Central journal article supplement — Antimicrob Agents Chemother. 2015 Nov 17;59(12):7290–8. doi: 10.1128/AAC.01816-15 (PMC4649164; doi:10.1128/aac.01816-15), 2015-11-17
Supplement: AAC.01816-15_zac012154577so1.pdf [file AAC.01816-15_zac012154577so1.pdf]

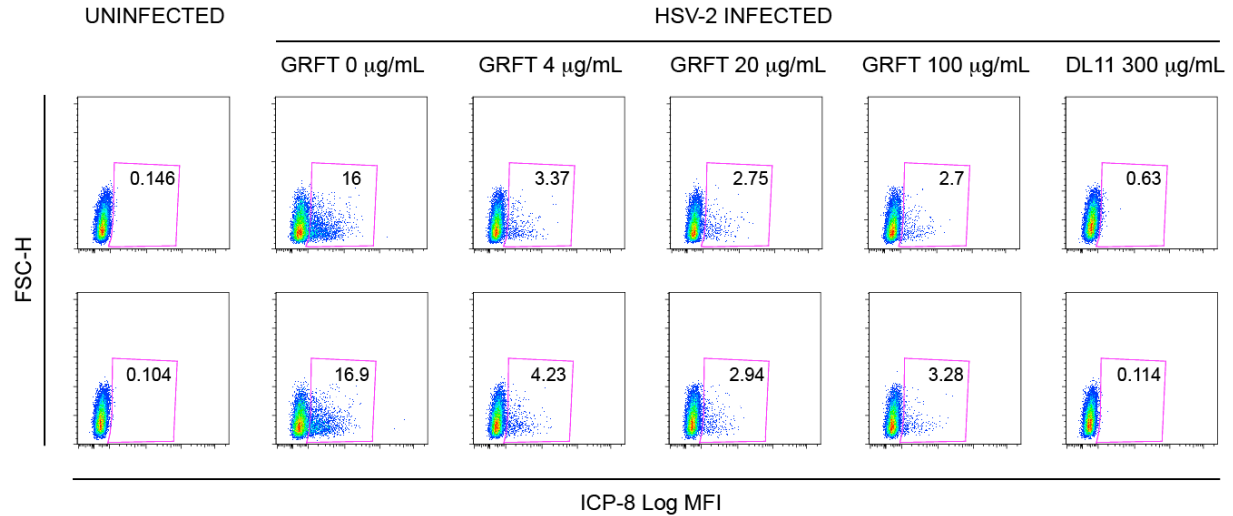

1  
2 **Figure S1. GRFT prevents HSV-2 infection in HeLa cells.** HeLa cells were treated with  
3 GRFT (4, 20 or 100  $\mu\text{g/mL}$ ), 50  $\mu\text{l}$  of MAb DL11 (300  $\mu\text{g/mL}$ ) or 50–100  $\mu\text{l}$  of medium for  
4 virus and cell controls followed by challenge with HSV-2 G at 1 m.o.i. in all wells with  
5 the exception of cell controls. The plates were first incubated for 4 h at 37°C, 5% CO<sub>2</sub>,  
6 and 98% humidity, then washed before adding fresh medium and incubated overnight.  
7 Cell monolayers were trypsinized and washed before staining and fixing for flow  
8 cytometry analyses. The results represent two independent experiments pooling six  
9 replicates per condition for anti-ICP-8 staining and flow cytometry analyses. Fifty  
10 thousand events/samples were acquired and results analyzed with the FlowJo Software  
11 V9.
